# Supplementary material for: Green preparation of holocellulose nanocrystals from burdock and their inhibitory effects against α-amylase and α-glucosidase
Source: Royal Society of Chemistry journal article supplement (doi:10.1039/d1fo02012a), 2021-11-08
Supplement: d1fo02012a1.pdf [file d1fo02012a1.pdf]

## Supporting Information

### **Green preparation of holocellulose nanocrystals from burdock and their inhibitory effects against $\alpha$ -Amylase and $\alpha$ -Glucosidase**

Ying Li<sup>c,a</sup>, Wei Liang<sup>a,c</sup>, Meigui Huang<sup>b</sup>, Wuyang Huang<sup>c,a</sup>, Jin Feng<sup>c,a,\*</sup>

<sup>a</sup> School of Food and Biological Engineering, Jiangsu University, 301 Xuefu Road, Zhenjiang 212013, China

<sup>b</sup> Department of food science and engineering, College of light industry and food engineering, Nanjing forestry university, 159 Longpan Road, Nanjing 210037, China

<sup>c</sup> Institute of Agro-product Processing, Jiangsu Academy of Agricultural Sciences, 50 Zhongling Street, Nanjing 210014, China

\*Corresponding author: Jin Feng (Address: 50 Zhongling Street, Nanjing 210014, China. Tel: +86-25-84392334; Fax: +86-25-84392334; E-mail: fengjinzju@163.com).

**Table S1.** Monosaccharide composition of burdock IDF and *hCNCs*.

| Samples          | Monosaccharide composition |               |               |                |               |              |                |               |                       |                     |
|------------------|----------------------------|---------------|---------------|----------------|---------------|--------------|----------------|---------------|-----------------------|---------------------|
|                  | Glucose (%)                | Fucose (%)    | Rhamnose (%)  | Xylose (%)     | Mannose (%)   | Fructose (%) | Arabinose (%)  | Galactose (%) | Galacturonic acid (%) | Glucuronic acid (%) |
| IDF              | 59.04 ± 1.36 a             | 0.53 ± 0.03 c | 3.24 ± 0.25 d | 10.63 ± 0.59 c | 1.69 ± 0.27 c | 0.63 ± 0.10  | 10.06 ± 1.17 c | 4.37 ± 0.32 c | 9.45 ± 0.59 c         | 0.36 ± 0.06 b       |
| <i>hCNC</i> -600 | 62.66 ± 1.87 b             | 0.19 ± 0.02 b | 2.21 ± 0.17 c | 6.70 ± 0.23 a  | 1.45 ± 0.04 b | ND           | 12.88 ± 0.21 d | 3.27 ± 0.12 c | 10.17 ± 1.03 d        | 0.49 ± 0.02 c       |
| <i>hCNC</i> -400 | 64.23 ± 2.23 b             | 0.15 ± 0.01 a | 1.43 ± 0.12 b | 15.71 ± 0.34 d | 1.44 ± 0.12 b | ND           | 8.74 ± 0.65 b  | 2.23 ± 0.17 b | 5.77 ± 0.23 b         | 0.30 ± 0.02 a       |
| <i>hCNC</i> -300 | 71.92 ± 1.76 c             | 0.16 ± 0.02 a | 1.09 ± 0.07 a | 10.38 ± 0.43 c | 1.62 ± 0.21 c | ND           | 7.72 ± 0.87 a  | 1.81 ± 0.22 a | 5.06 ± 0.21 a         | 0.25 ± 0.03 a       |
| <i>hCNC</i> -200 | 72.59 ± 2.23 c             | 0.16 ± 0.01 a | 1.19 ± 0.13 a | 9.71 ± 0.43 b  | 1.28 ± 0.17 a | ND           | 7.31 ± 0.29 a  | 1.87 ± 0.21 a | 5.62 ± 0.32 b         | 0.27 ± 0.04 a       |

ND: not detected.

Different lowercase letters in the same column represent significant differences in chemical composition ( $P < 0.05$ ).

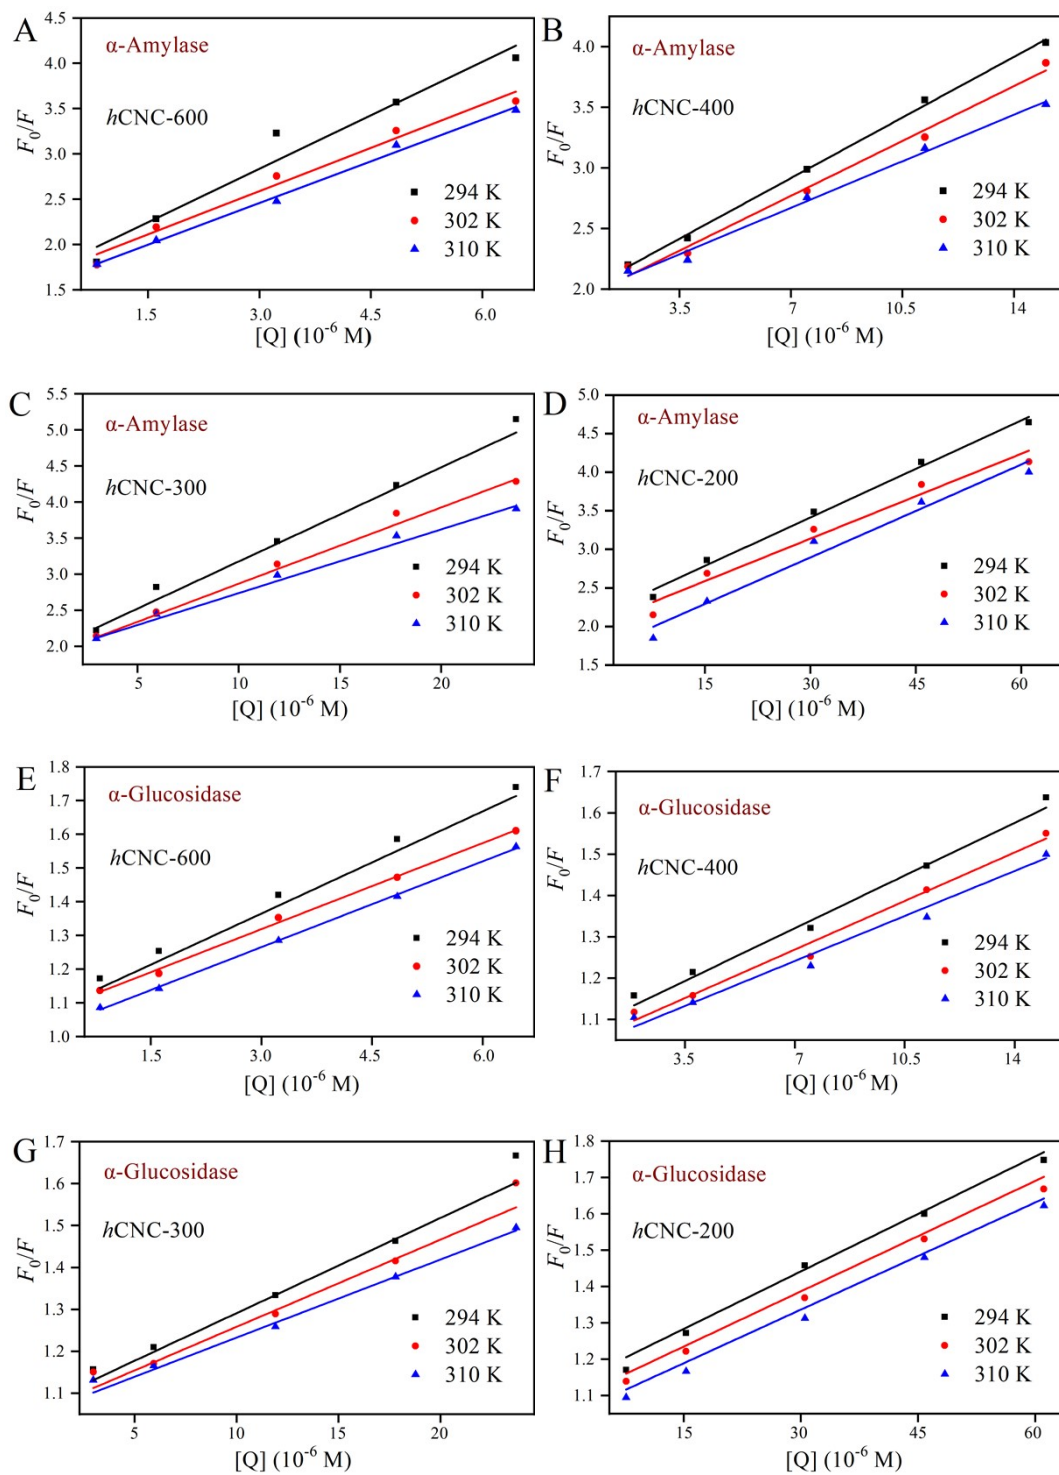

**Fig. S1.** Stem-Volmer plots describing  $\alpha$ -Amylase (a-d) and  $\alpha$ -Glucosidase (e-h) quenching induced by *hCNC-600*, *hCNC-400*, *hCNC-300*, and *hCNC-200* at different temperatures.

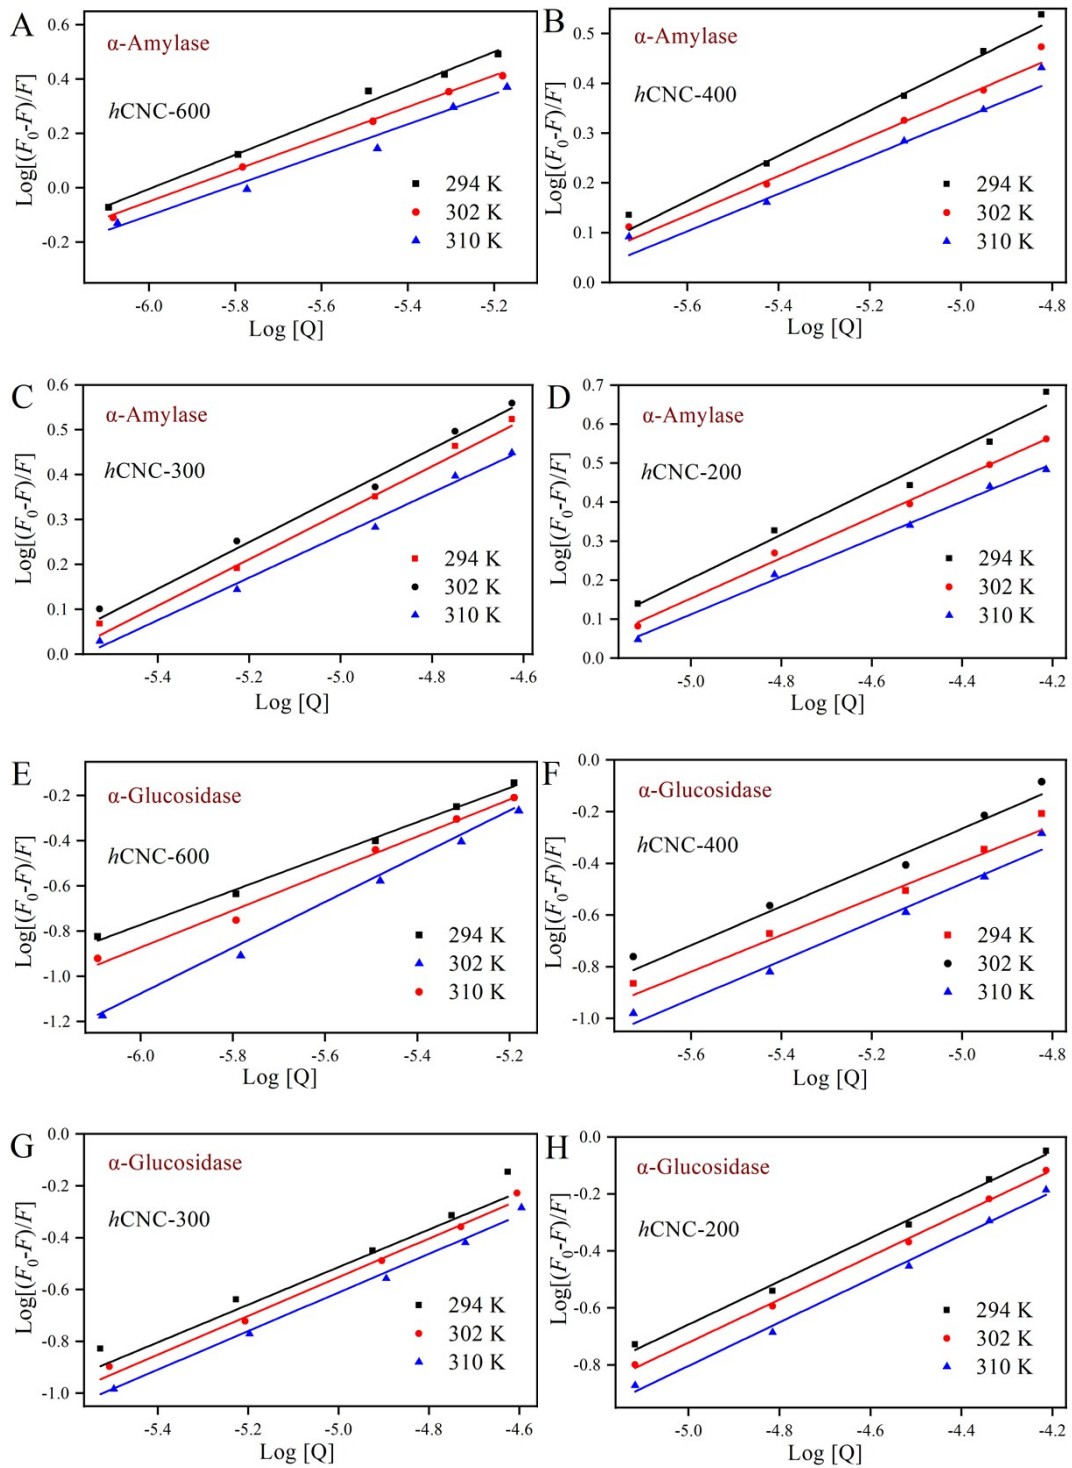

**Fig. S2.** The plots of log of  $(F_0 - F)/F$  versus log  $[Q]$  for the interactions between hCNCs and  $\alpha$ -Amylase (a-d) or  $\alpha$ -Glucosidase binding (e-h) at different temperatures.

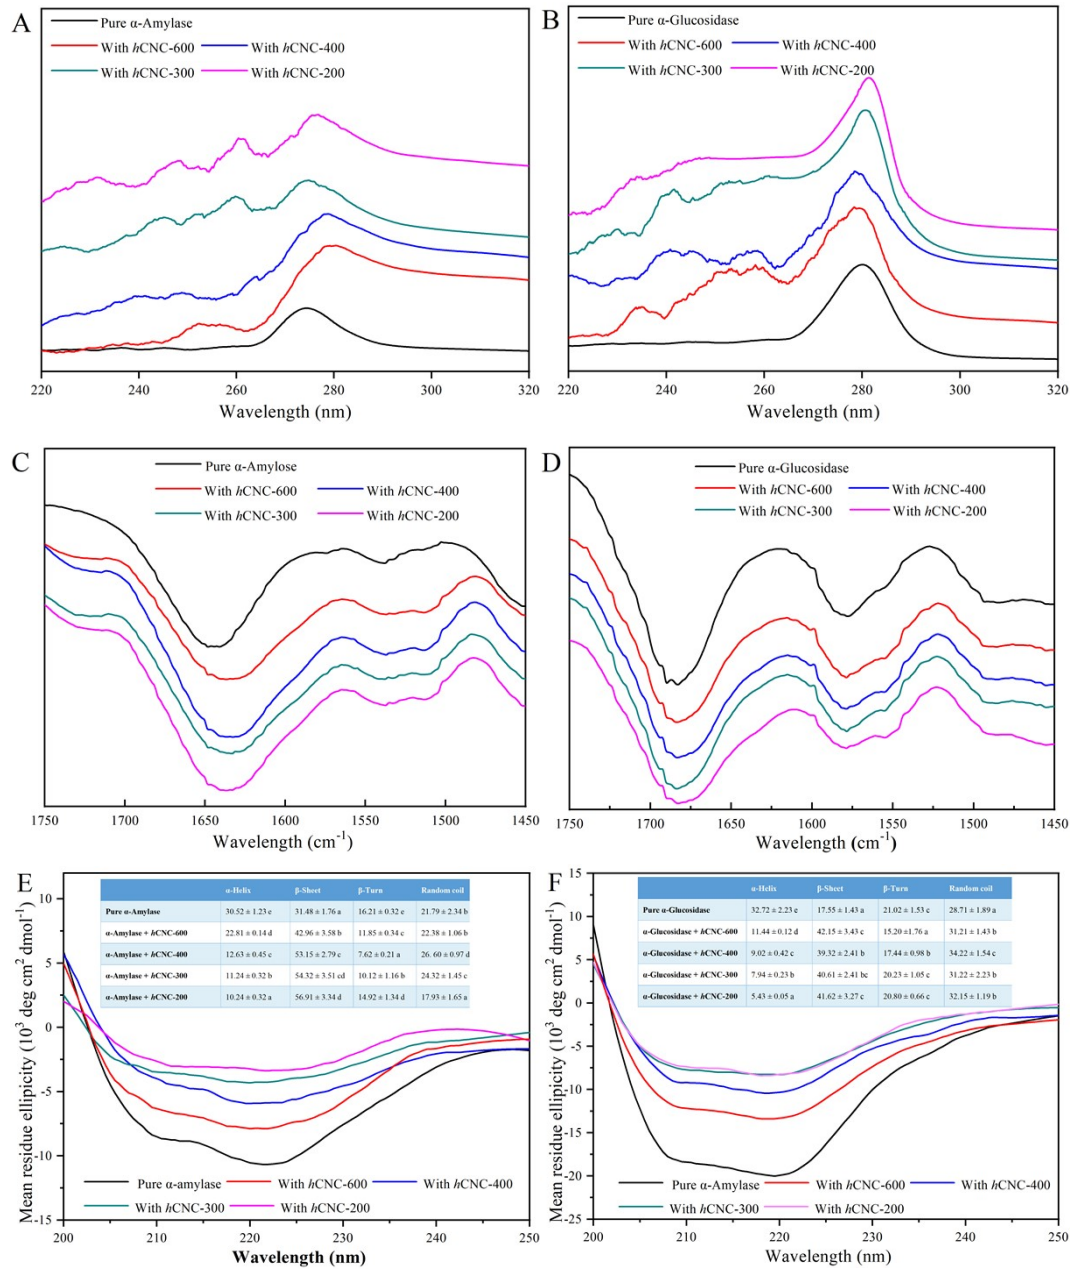

**Fig. S3.** The UV-Vis spectra (a, b), FT-IR spectra (c, d), and CD spectra (e, f) of pure  $\alpha$ -Amylase or  $\alpha$ -Glucosidase and in the presences of different hCNCs. The composition of the secondary structure was summarized in the sets in e and f, and different lowercase letters in the same column represent significant differences ( $P < 0.05$ ).

**Table S2.** Kinetic parameters for  $\alpha$ -Amylase inhibition in the presence of different *hCNCs*. Different lowercase letters in the same column represent significant differences ( $P < 0.05$ ).

| <b>Sample</b>                 | <b><math>V_{\max}</math><br/>(<math>\Delta A540/\text{min}</math>)</b> | <b><math>K_m</math><br/>(mM)</b> | <b><math>R^2</math></b> | <b>Inhibition type</b>           |
|-------------------------------|------------------------------------------------------------------------|----------------------------------|-------------------------|----------------------------------|
| Control                       | 0.107 $\pm$ 0.012 g                                                    | 2.451 $\pm$ 0.023 c              | 0.991                   |                                  |
| 0.5 mg/ml of <i>hCNC</i> -600 | 0.080 $\pm$ 0.002 f                                                    | 2.446 $\pm$ 0.109 c              | 0.997                   | Noncompetitive                   |
| 1.0 mg/ml of <i>hCNC</i> -600 | 0.066 $\pm$ 0.001 c                                                    | 2.495 $\pm$ 0.056 c              | 0.993                   |                                  |
| 0.5 mg/ml of <i>hCNC</i> -400 | 0.069 $\pm$ 0.002 d                                                    | 2.118 $\pm$ 0.214 b              | 0.999                   | Uncompetitive and noncompetitive |
| 1.0 mg/ml of <i>hCNC</i> -400 | 0.051 $\pm$ 0.003 a                                                    | 1.956 $\pm$ 0.102 a              | 0.999                   |                                  |
| 0.5 mg/ml of <i>hCNC</i> -300 | 0.075 $\pm$ 0.004 e                                                    | 2.497 $\pm$ 0.051 c              | 0.997                   | Noncompetitive                   |
| 1.0 mg/ml of <i>hCNC</i> -300 | 0.056 $\pm$ 0.003 b                                                    | 2.483 $\pm$ 0.129 c              | 0.988                   |                                  |
| 0.5 mg/ml of <i>hCNC</i> -200 | 0.073 $\pm$ 0.006 e                                                    | 2.830 $\pm$ 0.129 d              | 0.994                   | Competitive and noncompetitive   |
| 1.0 mg/ml of <i>hCNC</i> -200 | 0.063 $\pm$ 0.005 c                                                    | 3.125 $\pm$ 0.059 e              | 0.999                   |                                  |

**Table S3.** Kinetic parameters of  $\alpha$ -Glucosidase inhibition in the presence of different *hCNCs*. Different lowercase letters in the same column represent significant differences ( $P < 0.05$ ).

| <b>Sample</b>                 | <b><math>V_{\max}</math><br/>(<math>\Delta A_{405}/\text{min}</math>)</b> | <b><math>K_m</math><br/>(mM)</b> | <b><math>R^2</math></b> | <b>Inhibition type</b>           |
|-------------------------------|---------------------------------------------------------------------------|----------------------------------|-------------------------|----------------------------------|
| Control                       | 0.198 $\pm$ 0.012 h                                                       | 10.09 $\pm$ 0.323 h              | 0.991                   |                                  |
| 0.5 mg/ml of <i>hCNC</i> -600 | 0.086 $\pm$ 0.003 d                                                       | 3.963 $\pm$ 0.213 b              | 0.996                   |                                  |
| 1.0 mg/ml of <i>hCNC</i> -600 | 0.063 $\pm$ 0.010 b                                                       | 3.445 $\pm$ 0.123 a              | 0.995                   |                                  |
| 0.5 mg/ml of <i>hCNC</i> -400 | 0.071 $\pm$ 0.002 c                                                       | 4.332 $\pm$ 0.243 c              | 0.999                   | Uncompetitive and noncompetitive |
| 1.0 mg/ml of <i>hCNC</i> -400 | 0.051 $\pm$ 0.003 a                                                       | 3.562 $\pm$ 0.156 a              | 0.996                   |                                  |
| 0.5 mg/ml of <i>hCNC</i> -300 | 0.148 $\pm$ 0.021 g                                                       | 8.785 $\pm$ 0.231 g              | 0.992                   |                                  |
| 1.0 mg/ml of <i>hCNC</i> -300 | 0.113 $\pm$ 0.003 e                                                       | 7.613 $\pm$ 0.413 f              | 0.996                   |                                  |
| 0.5 mg/ml of <i>hCNC</i> -200 | 0.129 $\pm$ 0.012 f                                                       | 6.081 $\pm$ 0.254 e              | 0.997                   |                                  |
| 1.0 mg/ml of <i>hCNC</i> -200 | 0.089 $\pm$ 0.004 d                                                       | 4.963 $\pm$ 0.189 d              | 0.997                   |                                  |
